# Supplementary material for: The Rim15-Endosulfine-PP2ACdc55 Signalling Module Regulates Entry into Gametogenesis and Quiescence via Distinct Mechanisms in Budding Yeast
Source: PLOS journal article supplement (doi:10.1371/journal.pgen.1004456), 2014-06-26
Supplement: S3 (10.1371/journal.pgen.1004456.s003) [file journal.pgen.1004456.s003]

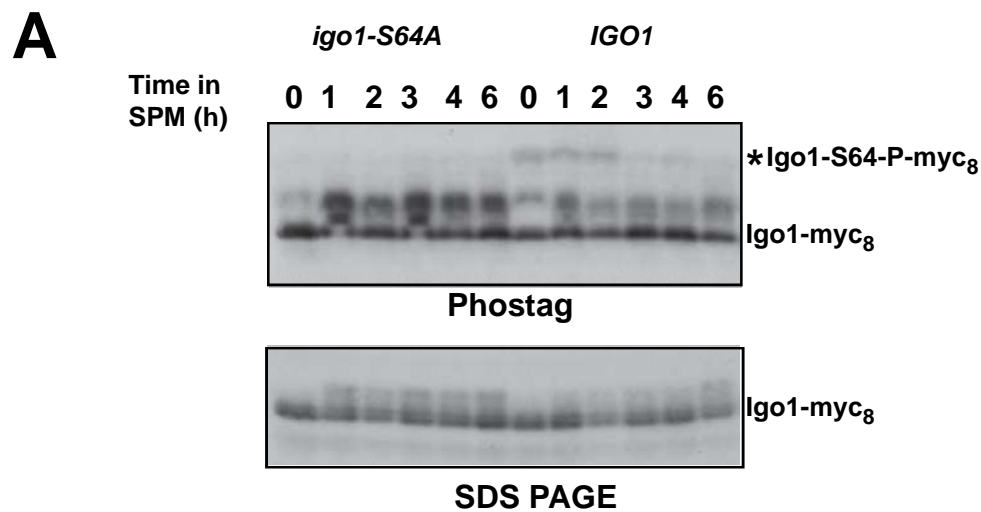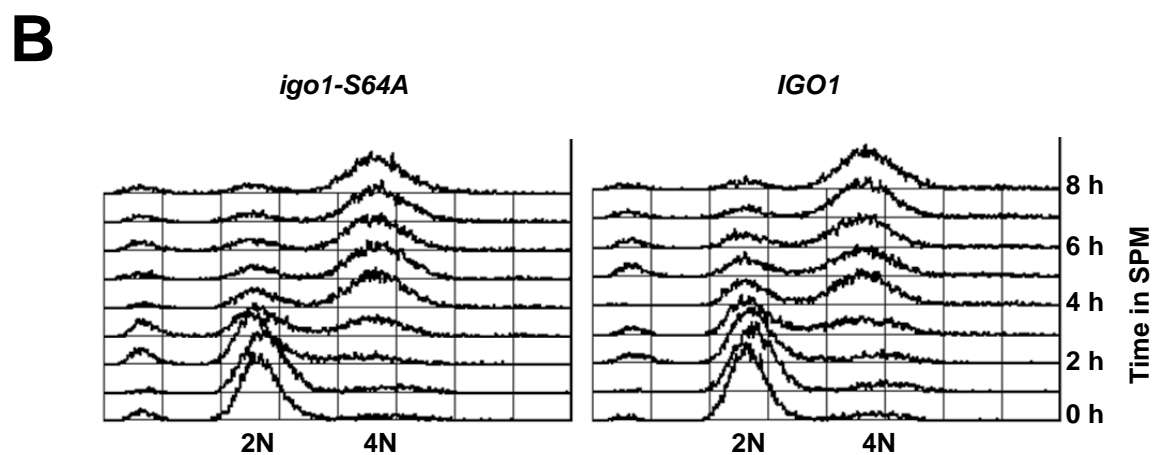

**Figure S3**
